# Supplementary material for: Multiple origins and a narrow genepool characterise the African tea germplasm: concordant patterns revealed by nuclear and plastid DNA markers
Source: Springer Nature journal article supplement (doi:10.1038/s41598-017-04228-0), 2017-06-16
Supplement: 41598_2017_4228_MOESM1_ESM.pdf [file 41598_2017_4228_MOESM1_ESM.pdf]

**Multiple origins and a narrow genepool characterise the African tea germplasm: concordant patterns revealed by nuclear and plastid DNA markers**

Moses Wambulwa, Muditha Kasun Meegahakumbura, Samson Kamunya, Alice Muchugi, Michael Möller, Jie Liu, Jianchu Xu, De-Zhu Li, Lian-Ming Gao

**Table S1:** Pairwise  $F_{ST}$  among the 11 countries. Countries were assumed to be populations.

|            | China   | India   | Sri Lanka | Kenya   | Tanzania | Rwanda  | Madagascar | Malawi  | Cameroon | Nigeria |
|------------|---------|---------|-----------|---------|----------|---------|------------|---------|----------|---------|
| India      | 0.06915 |         |           |         |          |         |            |         |          |         |
| Sri Lanka  | 0.07101 | 0.04242 |           |         |          |         |            |         |          |         |
| Kenya      | 0.07118 | 0.01008 | 0.05266   |         |          |         |            |         |          |         |
| Tanzania   | 0.13876 | 0.05542 | 0.09738   | 0.04719 |          |         |            |         |          |         |
| Rwanda     | 0.12636 | 0.02737 | 0.07838   | 0.03626 | 0.03994  |         |            |         |          |         |
| Madagascar | 0.10930 | 0.09329 | 0.12920   | 0.09440 | 0.16769  | 0.15128 |            |         |          |         |
| Malawi     | 0.13163 | 0.05649 | 0.10725   | 0.05832 | 0.08327  | 0.06586 | 0.16370    |         |          |         |
| Cameroon   | 0.08386 | 0.02171 | 0.04879   | 0.02380 | 0.03249  | 0.03041 | 0.11281    | 0.06916 |          |         |
| Nigeria    | 0.09025 | 0.00000 | 0.05306   | 0.00000 | 0.00000  | 0.00000 | 0.11393    | 0.03102 | 0.00000  |         |
| S. Africa  | 0.14538 | 0.04570 | 0.10485   | 0.05145 | 0.08576  | 0.07405 | 0.18339    | 0.01282 | 0.06799  | 0.03911 |

**Table S2:** Composition and distribution of the 22 cpDNA haplotypes

| Haplotype | Individuals                                                                                                                                                                                                                                                                                                                                                                                                                                                  | Country                                                             |
|-----------|--------------------------------------------------------------------------------------------------------------------------------------------------------------------------------------------------------------------------------------------------------------------------------------------------------------------------------------------------------------------------------------------------------------------------------------------------------------|---------------------------------------------------------------------|
| H1        | EPK_TN14_3 'TRFK_73/3' 'TRFK_395/2' 'TRFK_6/8' 'TRIT_201/16' 'TRIT_201/44' 'TRIT_201/50' 'TRIT_201/73' 'TRIT_201/75' 'TRIT_201/82' '15/37' G539 'K/29' '8/9' '35/49' PMC_B1 'K/108' IB241 IR4 Var_68 Var_318 Var_143 CL_301 CL_303 'TRFK_303/577+' 'TRFK_303/178' 'TRFK_303/216' TV9 TV25 'Singpo_1' 'TRI_4052' NNS4                                                                                                                                         | Kenya, Tanzania, Rwanda, Nigeria, Cameroon, China, India, Sri Lanka |
| H2        | 'TRFK_430/90' 'TRFK_76/3' BBK_5 'TRFK_52/1' 'TRFK_829/3' 'TRFK_829/7' 'TRFK_831/1' '16/4_Mukumbani_BB_S' '16/4_Mukumbani_SFS_' '16/4_Mukumbani_SFS_' '16/4_Shivatse' 'AHP_S15/10' IB79 'IB/108' Indian_hybrid_Seedli SFS_371 MT_12 PC_108 PC_165 PC_185 PC_117 Var_BB35 CL_168 CL_671 KTDA_B1 'MICH1_5/1/1/20' BBK_35 BBK_21 'TRFK_303/259' 'TRFK_430/52' 'TRFK_430/63' 'TRFK_375/5' 'TRFK_383/4' 'TRFK_371/3' 'TRI_4071' TV2 TV5 TV6 TV8 TV12 TV13 'AUGC_1' | Kenya, South Africa, Rwanda, Malawi, Nigeria, India, Sri Lanka      |
| H3        | TRFK_St_536 'TRFK_830/12' 'TRFK_830/15' CL_17 China_hybrid_seedling, Namroop 6, Huangdao Tea, Dabai Tea, 'Caicha_5, Huangshan Tea, 'Namroop_1' 'Namroop_8' 'Namroop_10' Guiyang 1, Guiyang 7, Guiyang 8, Wuyuan 2,                                                                                                                                                                                                                                           | Kenya, Malawi, China,                                               |

|     |                                                                                                                                   |                         |
|-----|-----------------------------------------------------------------------------------------------------------------------------------|-------------------------|
|     | Longjing Tea 1, Caicha 1, Longjing Tea Yucha 1, Longjing Tea Yucha 3, Longjing Tea Yucha 6, Huaqiu 08, Mingshan 131, Liuanguapian | India                   |
| H4  | 'TRFK_306/4' 'TRFK_91/1'                                                                                                          | Kenya                   |
| H5  | 'TRFK_657/1' 'TRFK_824/1' 'TRFK_301/1' 'TRFK_301/2' 'TRFK_301/3'                                                                  | Kenya                   |
| H6  | 'TRFK_713/1' '12/56' 'TRFK_301/4' 'TRFK_301/5' 'TRFK_301/6'                                                                       | Kenya                   |
| H7  | CL_1932                                                                                                                           | Cameroon                |
| H8  | 'CL_H81/22' 'STC_L6__38/8_'                                                                                                       | Kenya, Cameroon         |
| H9  | MD03 MD04 MD15                                                                                                                    | Madagascar              |
| H10 | NL2                                                                                                                               | China (Southern Yunnan) |
| H11 | XD13                                                                                                                              | China (Southern Yunnan) |
| H12 | TV 21                                                                                                                             | India                   |
| H13 | DA3 MH2 MQ7 YT15                                                                                                                  | China (Southern Yunnan) |
| H14 | Baihao                                                                                                                            | China (Southern Yunnan) |
| H15 | JX11                                                                                                                              | China (Southern Yunnan) |
| H16 | JM13 JM15                                                                                                                         | China (Southern Yunnan) |
| H17 | TV15 TV23 TV29 'Powe1_4'                                                                                                          | India                   |

|     |                           |       |
|-----|---------------------------|-------|
| H18 | ZD6                       | China |
| H19 | GM9 MK7 LBZ11 BW1 WQ6 FS8 | China |
| H20 | JL9 LME7                  | China |
| H21 | Zijuan Tea                | China |
| H22 | Bangdong Assam Tea        | China |

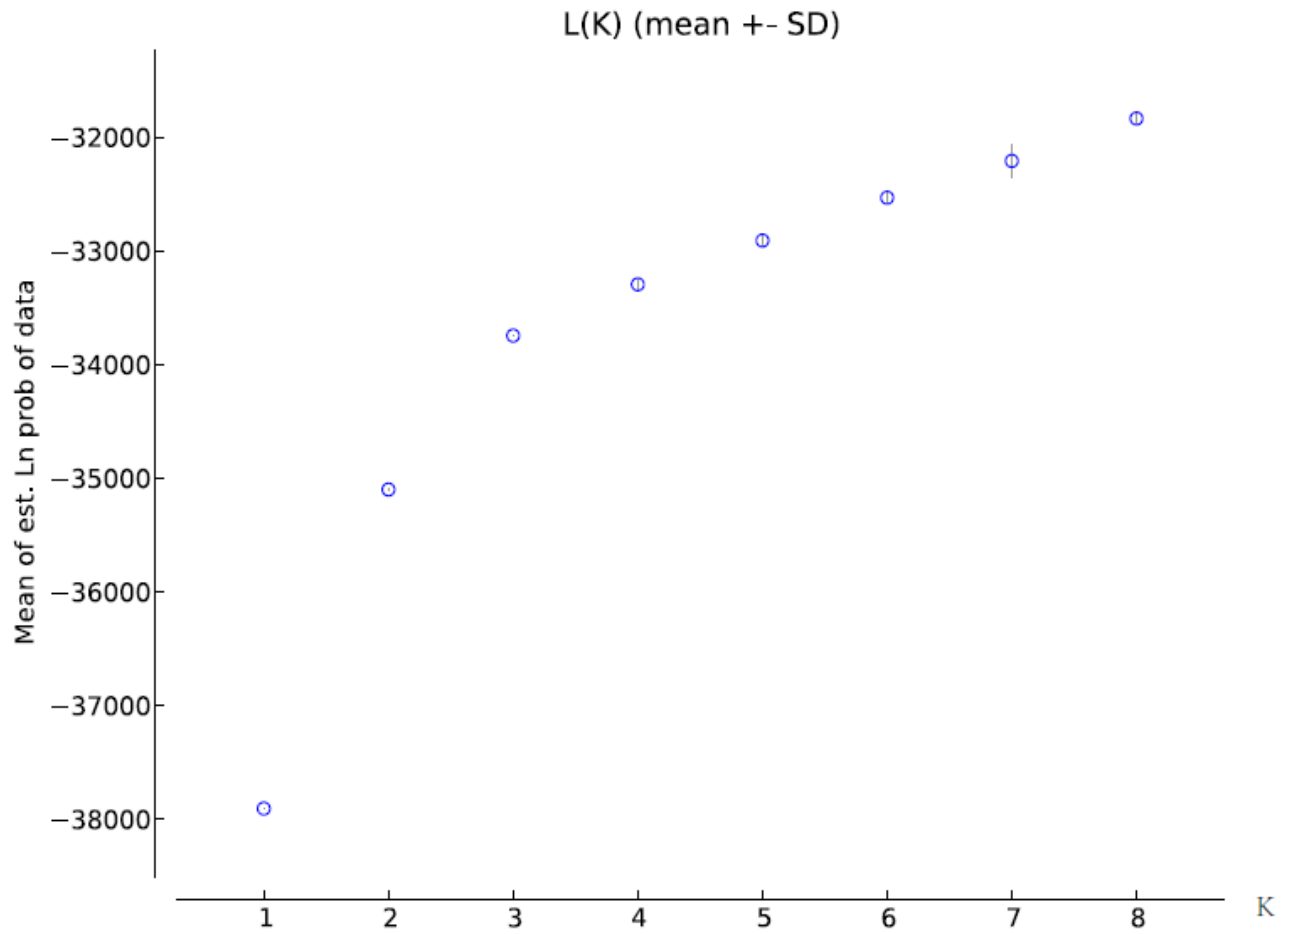

**Fig. S1:** Estimation of the optimal value of  $K$  using the  $L(K)$  method. According to this method,  $L(K)$  plateaus when  $K$  approaches the true value; which is  $K = 3$  in this case.

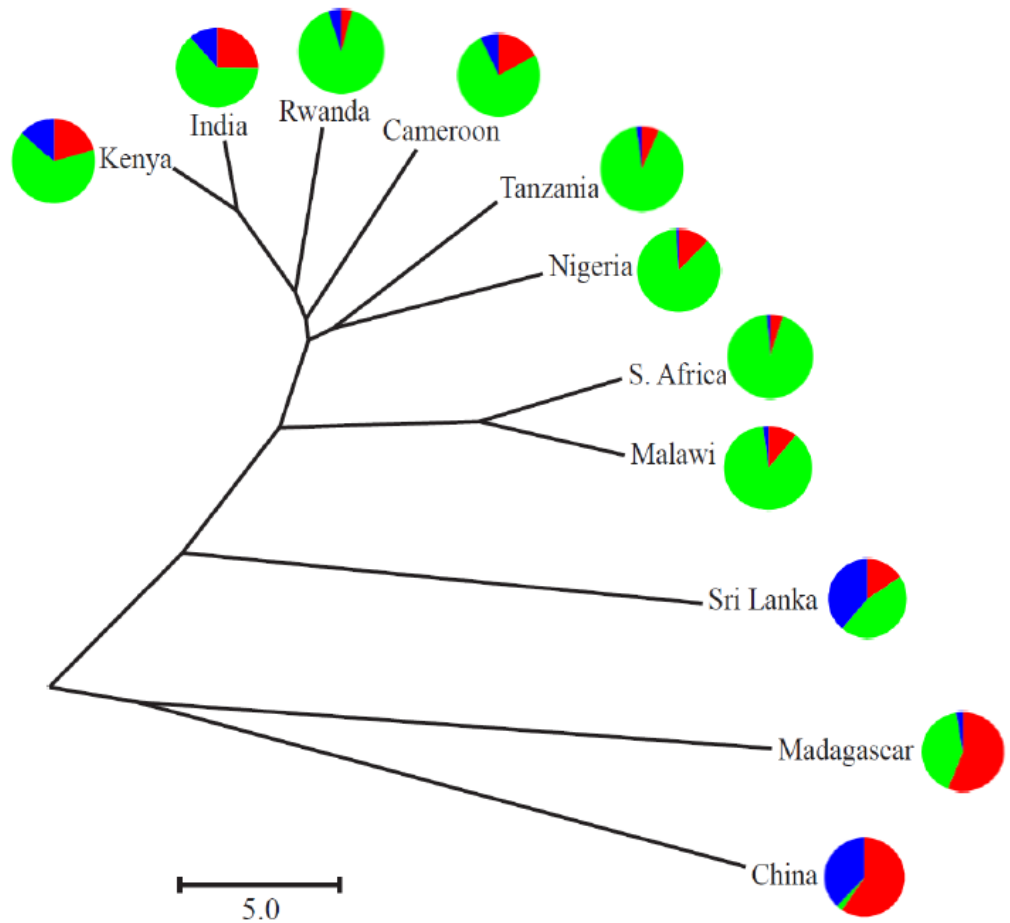

**Fig. S2:** Unrooted Fitch–Margoliash tree based on Nei’s standard genetic distance between tea accessions from 11 countries. The colours correspond to genetic clusters defined by the STRUCTURE analysis at  $K = 3$  in Fig. 1 with Group 1 (China tea) in red, Group 2 (Indian Assam tea) in green and Group 3 (Chinese Assam tea) in blue.

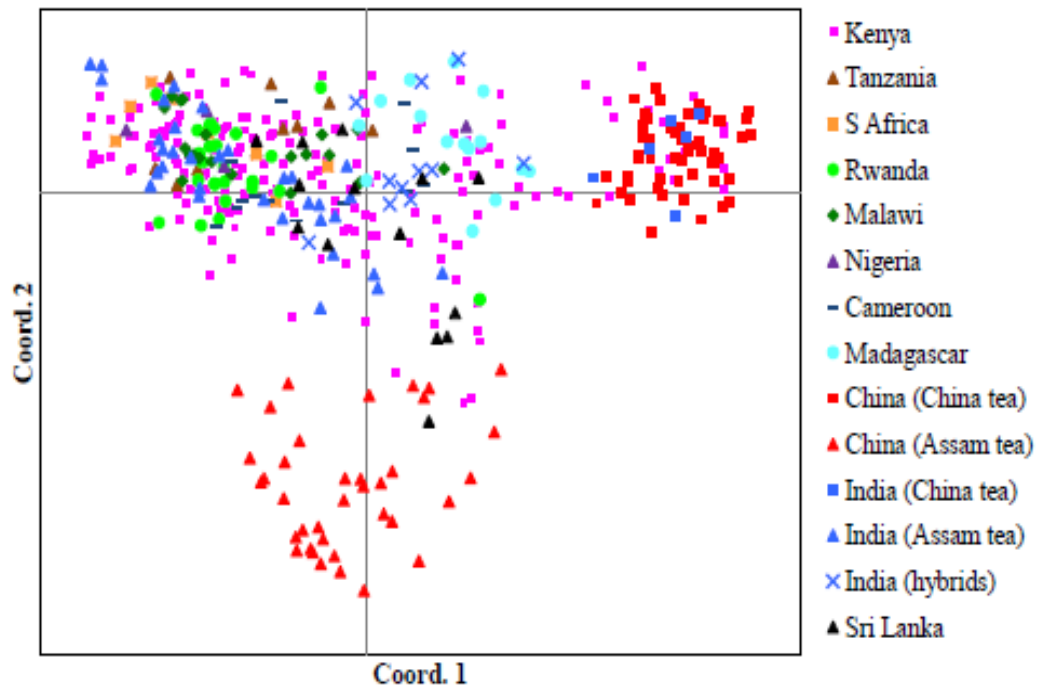

**Fig. S3:** Principal co-ordinates analysis (PCoA) for African and Asian tea accessions based on 23 nSSR loci. Coord 1 and Coord 2 represent the first and second co-ordinates, respectively. The two co-ordinates accounted for 59.60% of the total variation.

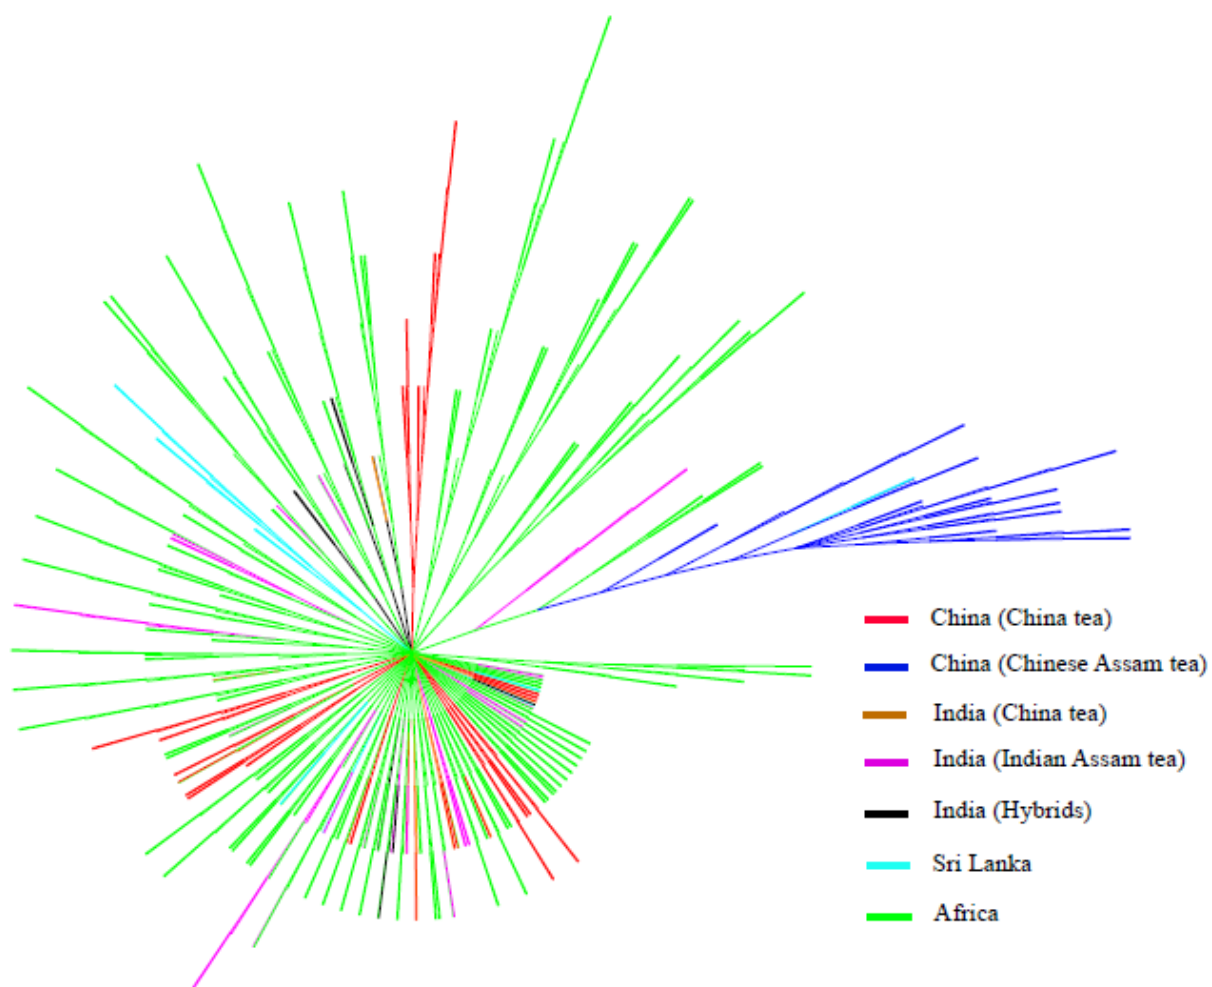

**Fig. S4:** Neighbour joining tree of 439 tea accessions from 11 countries in Africa and Asia. The tree was constructed from Nei's genetic distances. Different colours represent the various geographic regions as shown in the figure.



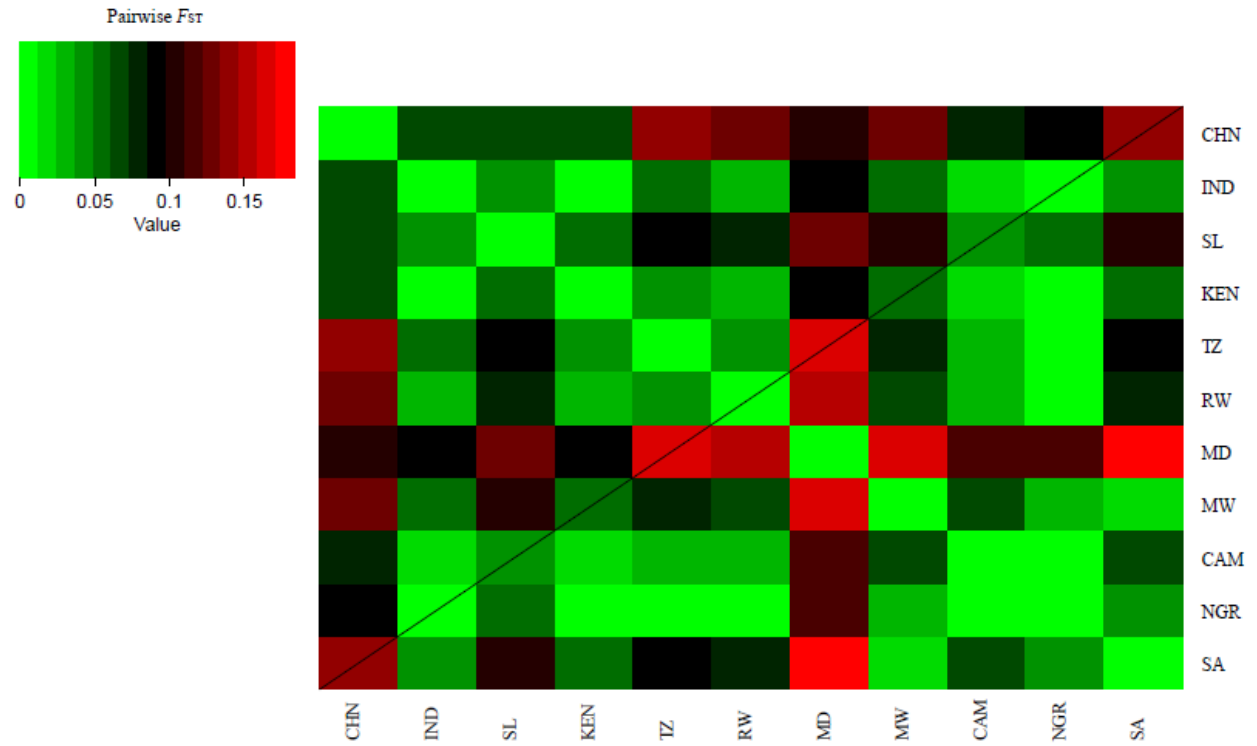

**Fig. S5:** Heat map view of pairwise  $F_{ST}$  among countries. The countries are arranged in the order of increasing geographic distance from China to South Africa.

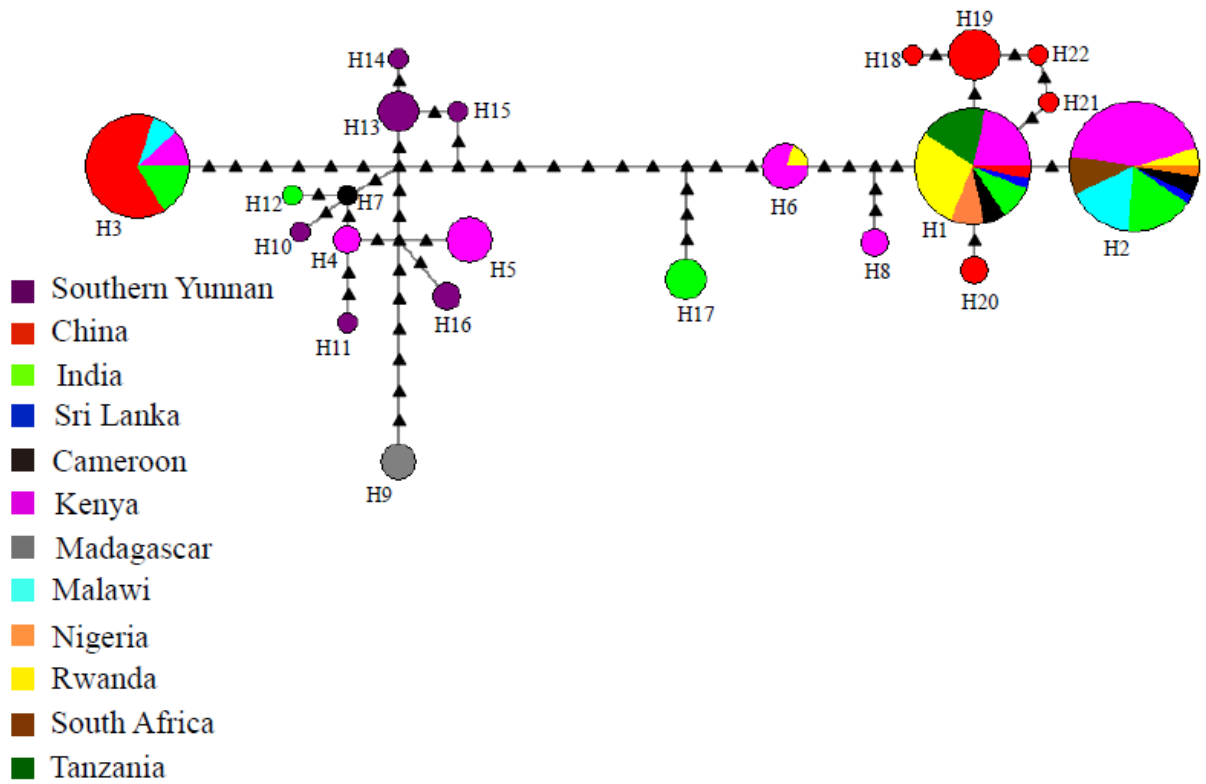

**Fig.S6:** Median joining network of haplotypes showing the distribution of the haplotypes in the 11 countries. The size of the circles corresponds to the frequency of each haplotype whereas the small black triangles represent mutational steps.

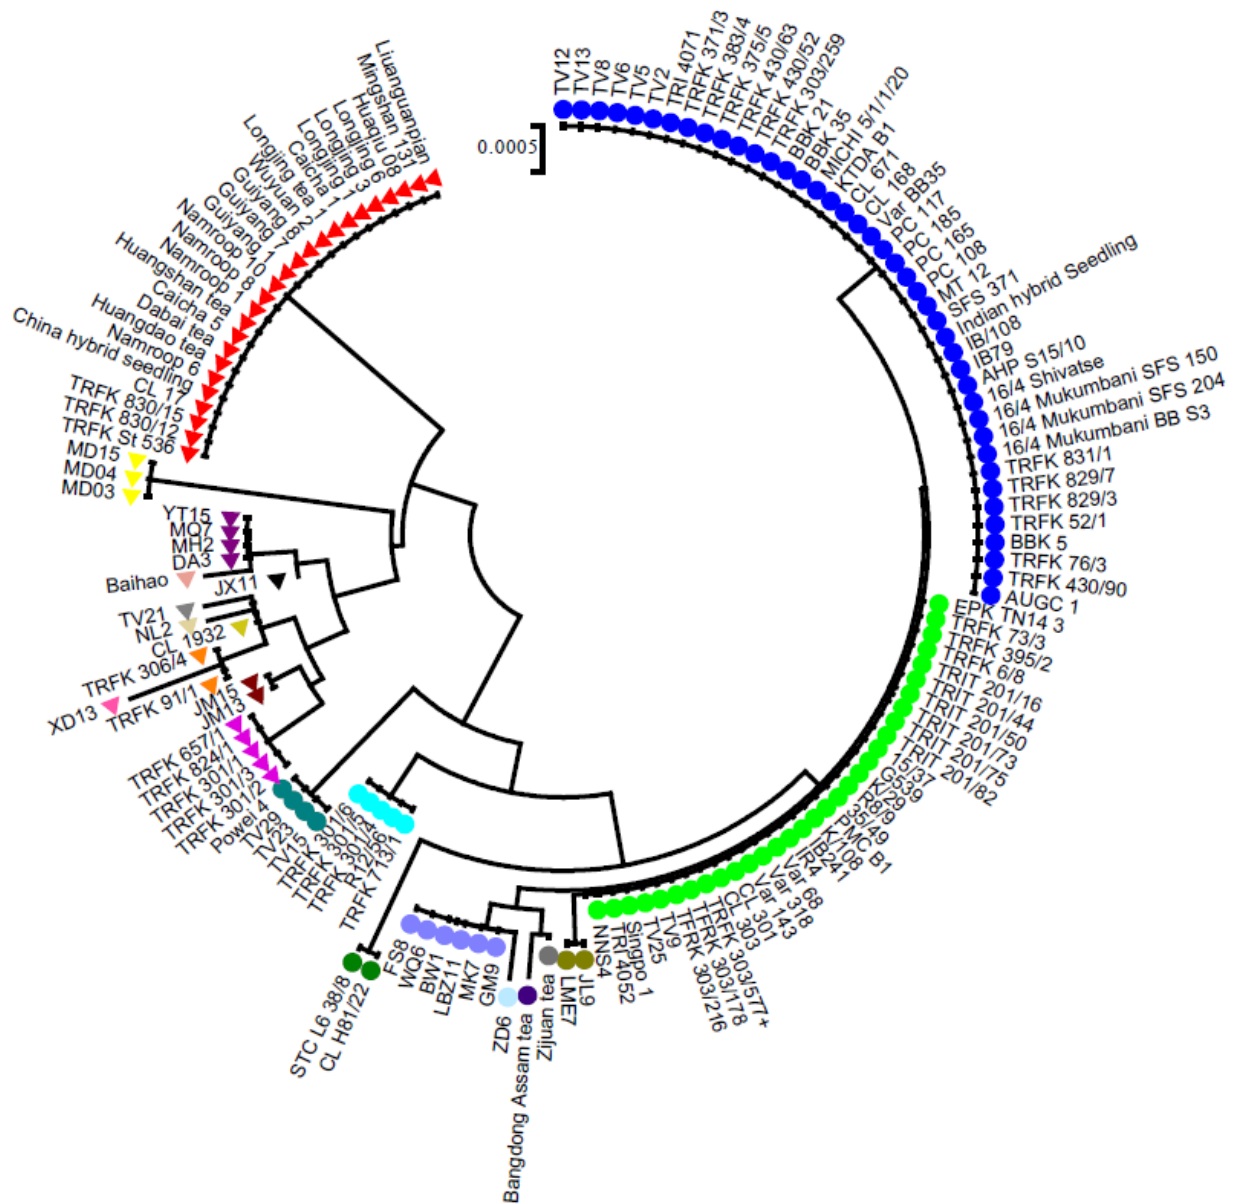

**Fig. S7:** An unrooted neighbour joining tree of 143 cpDNA sequences of cultivated tea. The tree is drawn to scale, with branch lengths in the same units as those of the evolutionary distances used to infer the tree. The colours correspond to the different haplotypes depicted in Fig 5.

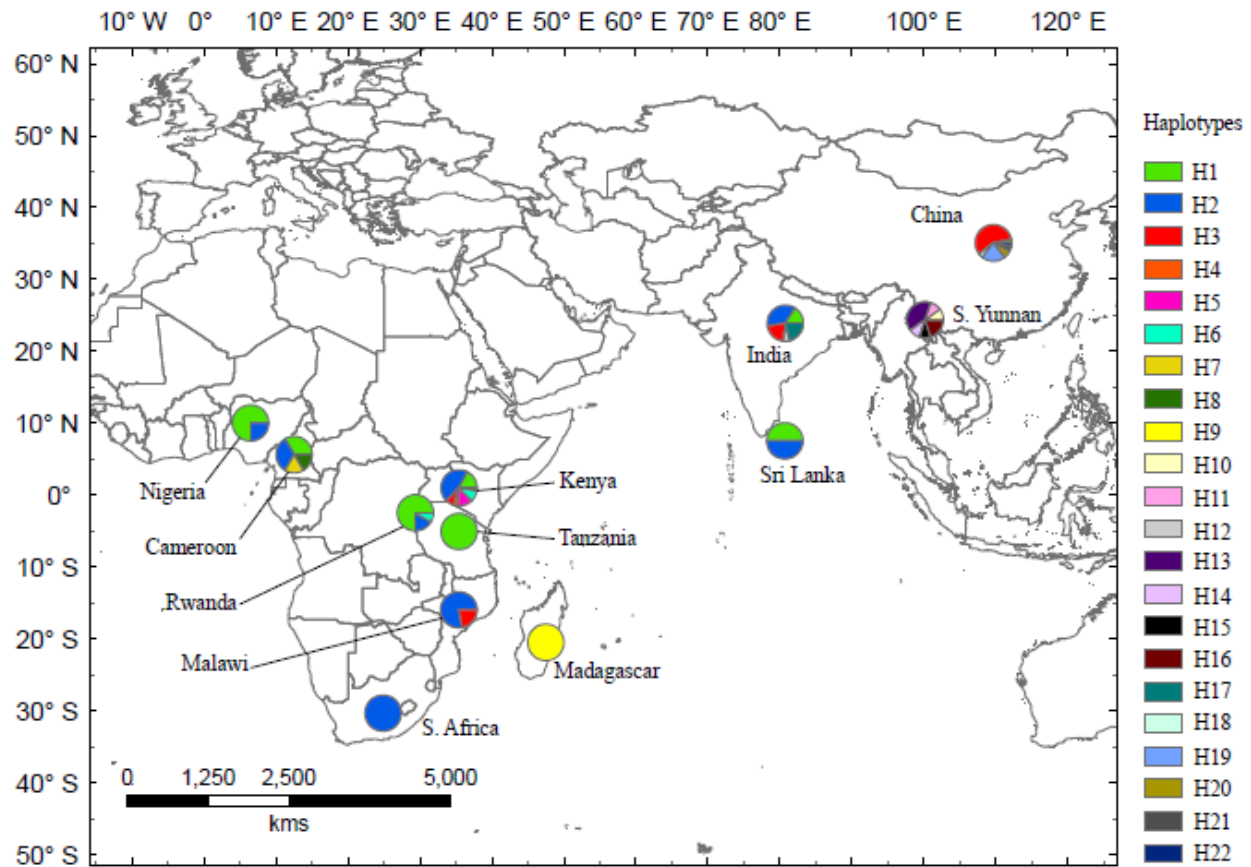

**Fig. S8:** Distribution of tea cpDNA haplotypes across 11 countries mapped using ArcGIS. The colours represent different haplotypes. The map was generated using DIVA-GIS and ArcGIS software as described for **Figure 2**.
